# Supplementary material for: Effect of Fermentation Humidity on Quality of Congou Black Tea
Source: MDPI journal article supplement (doi:10.3390/foods12081726), 2023-04-20
Supplement: s1 [file s1]

# Effect of Fermentation Humidity on Quality of Congou Black Tea

## Supplementary

**Table S1.** Effect of fermentation humidity on the chromatic aberration of congou black tea's infusion.

| Samples | L*          | a*         | b*          | b*/a*       |
|---------|-------------|------------|-------------|-------------|
| RH55    | 84.18±0.44a | 6.16±0.53a | 68.4±1.3a   | 11.15±0.78a |
| RH65    | 84.12±0.35a | 6.16±0.47a | 68.24±1.28a | 11.11±0.63a |
| RH75    | 84.29±0.55a | 5.8±0.7a   | 67.13±1.57a | 11.68±1.19a |
| RH85    | 84.19±0.62a | 5.8±0.69a  | 66.71±2.85a | 11.65±1.83a |
| RH95    | 84.1±0.64a  | 5.94±0.69a | 67.26±1.79a | 11.4±1.04a  |

Note: L\*, the brightness of the infusion; a\*, red-green tones, with positive values indicating the degree of redness; b\*, yellow-blue tones, with positive values indicating the degree of yellow; b\*/a\*, the hue. Different lowercase letters in the same column indicate a significant difference at  $p < 0.05$ .

**Table S2.** Content of volatile compounds under different fermentation humidity conditions. ( $\mu\text{g/g}$ )

| RT              | RI   | Compound Name                       | RH55              | RH65               | RH75               | RH85               | RH95              |
|-----------------|------|-------------------------------------|-------------------|--------------------|--------------------|--------------------|-------------------|
| <b>Alcohols</b> |      |                                     |                   |                    |                    |                    |                   |
| 4.30            | 863  | 3-Hexen-1-ol                        | 6.07 $\pm$ 0.23   | 6.05 $\pm$ 0.25    | 6.56 $\pm$ 0.64    | 7.67 $\pm$ 1.91    | 7.74 $\pm$ 0.81   |
| 8.09            | 1034 | Benzyl alcohol                      | 20.87 $\pm$ 1.49  | 21.30 $\pm$ 1.93   | 21.73 $\pm$ 2.16   | 22.15 $\pm$ 2.29   | 22.14 $\pm$ 0.72  |
| 9.35            | 1073 | cis-Furan linalool oxide            | 20.20 $\pm$ 1.98  | 20.25 $\pm$ 0.91   | 21.50 $\pm$ 0.57   | 21.52 $\pm$ 1.57   | 21.55 $\pm$ 0.93  |
| 9.93            | 1089 | trans-Furan linalool oxide          | 31.52 $\pm$ 1.48  | 31.59 $\pm$ 1.64   | 31.62 $\pm$ 1.25   | 31.86 $\pm$ 1.54   | 32.21 $\pm$ 1.17  |
| 10.43           | 1102 | Linalool                            | 31.63 $\pm$ 0.62b | 31.87 $\pm$ 1.59ab | 32.26 $\pm$ 1.00ab | 32.76 $\pm$ 1.79ab | 34.37 $\pm$ 1.94a |
| 10.98           | 1115 | Phenylethyl Alcohol                 | 51.24 $\pm$ 2.20  | 51.41 $\pm$ 2.39   | 51.68 $\pm$ 1.92   | 52.07 $\pm$ 2.85   | 52.59 $\pm$ 0.71  |
| 12.61           | 1152 | Isopulegol                          | 0.32 $\pm$ 0.02   | 0.31 $\pm$ 0.02    | 0.30 $\pm$ 0.03    | 0.30 $\pm$ 0.03    | 0.32 $\pm$ 0.02   |
| 12.82           | 1156 | cis-3-Nonen-1-ol                    | 1.47 $\pm$ 0.08   | 1.48 $\pm$ 0.16    | 1.51 $\pm$ 0.27    | 1.54 $\pm$ 0.21    | 1.61 $\pm$ 0.07   |
| 12.94           | 1158 | (E,Z)-3,6-Nonadien-1-ol             | 1.32 $\pm$ 0.04   | 1.28 $\pm$ 0.15    | 1.30 $\pm$ 0.15    | 1.26 $\pm$ 0.13    | 1.31 $\pm$ 0.03   |
| 13.24           | 1164 | Myrtenol                            | 0.46 $\pm$ 0.02a  | 0.42 $\pm$ 0.02b   | 0.40 $\pm$ 0.03bc  | 0.40 $\pm$ 0.01bc  | 0.37 $\pm$ 0.02c  |
| 13.66           | 1173 | trans-Pyranoid linalool oxide       | 16.73 $\pm$ 1.01b | 17.19 $\pm$ 1.24ab | 17.24 $\pm$ 1.10ab | 18.08 $\pm$ 1.04ab | 18.78 $\pm$ 0.36a |
| 13.94           | 1178 | cis-Pyranoid linalool oxide         | 29.23 $\pm$ 0.78  | 29.46 $\pm$ 2.46   | 29.48 $\pm$ 2.43   | 29.56 $\pm$ 2.25   | 29.78 $\pm$ 0.25  |
| 14.43           | 1187 | 2,6-Dimethyl-3,7-octadiene-2,6-diol | 1.49 $\pm$ 0.07   | 1.50 $\pm$ 0.18    | 1.50 $\pm$ 0.18    | 1.51 $\pm$ 0.12    | 1.51 $\pm$ 0.08   |
| 14.87           | 1195 | dihydrocarveol                      | 1.81 $\pm$ 0.04   | 1.77 $\pm$ 0.11    | 1.80 $\pm$ 0.08    | 1.80 $\pm$ 0.16    | 1.83 $\pm$ 0.12   |
| 16.36           | 1224 | Nerol                               | 3.21 $\pm$ 0.29b  | 3.34 $\pm$ 0.32ab  | 3.55 $\pm$ 0.14ab  | 3.57 $\pm$ 0.32ab  | 3.77 $\pm$ 0.24a  |
| 16.64           | 1229 | Isogeraniol                         | 1.94 $\pm$ 0.11   | 1.95 $\pm$ 0.15    | 2.00 $\pm$ 0.18    | 2.04 $\pm$ 0.33    | 2.06 $\pm$ 0.10   |
| 17.96           | 1253 | Geraniol                            | 26.84 $\pm$ 0.78  | 26.89 $\pm$ 1.86   | 27.12 $\pm$ 1.56   | 27.33 $\pm$ 1.69   | 27.83 $\pm$ 1.28  |
| 19.13           | 1273 | 2,6-Dimethyl-1,7-octadiene-3,6-diol | 1.82 $\pm$ 0.15   | 1.85 $\pm$ 0.11    | 1.85 $\pm$ 0.15    | 2.08 $\pm$ 0.11    | 2.15 $\pm$ 0.25   |

|                              |      |                                |             |             |             |              |              |
|------------------------------|------|--------------------------------|-------------|-------------|-------------|--------------|--------------|
| 20.77                        | 1299 | Cumic alcohol                  | 0.32±0.04c  | 0.44±0.04ab | 0.49±0.05a  | 0.40±0.02b   | 0.39±0.01b   |
| 23.87                        | 1361 | 8-Hydroxylinalool              | 0.81±0.08   | 0.83±0.09   | 0.84±0.08   | 1.02±0.14    | 0.95±0.13    |
| 33.82                        | 1555 | Nerolidol                      | 4.71±0.25a  | 4.36±0.48ab | 4.27±0.31ab | 4.25±0.60ab  | 3.92±0.12b   |
| 35.62                        | 1591 | Alpha-Cedrol                   | 0.94±0.05   | 0.96±0.05   | 1.15±0.12   | 1.00±0.10    | 1.02±0.05    |
| 36.50                        | 1616 | Widdrol                        | 0.56±0.05   | 0.63±0.01   | 0.66±0.11   | 0.75±0.10    | 0.66±0.04    |
| 37.06                        | 1636 | Cadinol T                      | 0.36±0.01c  | 0.37±0.02c  | 0.41±0.04bc | 0.52±0.05a   | 0.42±0.01b   |
| 37.45                        | 1649 | alpha-Cadinol                  | 0.82±0.02   | 0.87±0.08   | 0.93±0.11   | 0.80±0.08    | 0.64±0.48    |
| 39.85                        | 1750 | cis-Lanceol                    | 0.04±0.00b  | 0.05±0.00a  | 0.04±0.00b  | 0.05±0.01a   | 0.05±0.01a   |
| 44.58                        | 2108 | Phytol                         | 0.50±0.01a  | 0.47±0.05ab | 0.37±0.04c  | 0.30±0.03d   | 0.41±0.03bc  |
| <b>Alkanes &amp; Alkenes</b> |      |                                |             |             |             |              |              |
| 8.00                         | 1031 | Limonene                       | 10.33±0.80b | 10.40±1.00b | 13.97±1.56a | 12.37±1.61ab | 12.27±0.75ab |
| 15.20                        | 1201 | Dodecane                       | 0.38±0.04b  | 0.38±0.01b  | 0.43±0.02b  | 0.49±0.05a   | 0.50±0.04a   |
| 20.93                        | 1302 | 1-Methylnaphthalene            | 0.13±0.02ab | 0.12±0.01bc | 0.15±0.02a  | 0.10±0.01c   | 0.11±0.02bc  |
| 25.97                        | 1398 | Tetradecane                    | 0.36±0.02   | 0.35±0.02   | 0.37±0.06   | 0.40±0.07    | 0.41±0.01    |
| 29.15                        | 1461 | Alloaromadendrene              | 0.03±0.00c  | 0.04±0.00bc | 0.05±0.01a  | 0.04±0.01b   | 0.04±0.00bc  |
| 31.08                        | 1496 | α-Farnesene                    | 0.61±0.06c  | 0.85±0.03bc | 1.01±0.17b  | 1.56±0.08a   | 1.59±0.23a   |
| 31.60                        | 1505 | δ-Cadinene                     | 0.81±0.06b  | 0.83±0.06b  | 0.97±0.06a  | 0.82±0.01b   | 0.75±0.04b   |
| <b>Esters</b>                |      |                                |             |             |             |              |              |
| 14.64                        | 1191 | Methylsalicylate               | 12.25±0.88  | 12.32±0.92  | 12.82±0.90  | 12.91±0.99   | 12.92±0.80   |
| 16.58                        | 1228 | Linalylformate                 | 1.28±0.03   | 1.28±0.05   | 1.27±0.13   | 1.28±0.13    | 1.30±0.09    |
| 17.11                        | 1238 | cis-3-Hexenyl3-methylbutanoate | 2.97±0.16   | 2.95±0.18   | 2.96±0.14   | 3.12±0.29    | 3.20±0.45    |

|       |      |                              |            |             |             |            |            |
|-------|------|------------------------------|------------|-------------|-------------|------------|------------|
| 19.43 | 1278 | 1,5-Octalactone              | 1.88±0.05  | 1.96±0.17   | 1.99±0.14   | 2.04±0.08  | 2.38±0.35  |
| 19.81 | 1284 | Isopulegylacetate            | 0.24±0.03a | 0.21±0.02a  | 0.21±0.04a  | 0.15±0.02b | 0.20±0.02a |
| 23.65 | 1356 | Gamma-Nonalactone            | 0.76±0.11  | 0.77±0.11   | 0.79±0.05   | 0.90±0.07  | 0.85±0.12  |
| 24.06 | 1364 | Butoxyethoxyethylacetate     | 2.74±0.17  | 2.83±0.15   | 3.16±0.23   | 3.06±0.30  | 2.90±0.15  |
| 24.91 | 1380 | cis-3-Hexenylhexanoate       | 6.73±0.29  | 6.46±0.26   | 6.22±0.93   | 6.17±0.75  | 5.75±0.40  |
| 25.09 | 1383 | cis-3-Hexenylcis-3-hexenoate | 1.33±0.14a | 0.96±0.11b  | 0.90±0.06b  | 1.03±0.16b | 0.93±0.11b |
| 25.19 | 1385 | Hexylhexanoate               | 2.76±0.08  | 2.79±0.14   | 2.86±0.26   | 3.03±0.28  | 2.73±0.18  |
| 25.37 | 1388 | trans-2-Hexenylhexanoate     | 5.45±0.20a | 4.51±0.27b  | 4.49±0.29b  | 4.48±0.54b | 4.27±0.30b |
| 27.05 | 1420 | Coumarin                     | 0.80±0.09  | 0.82±0.04   | 0.86±0.04   | 0.92±0.07  | 0.92±0.09  |
| 27.58 | 1431 | Phenethylbutyrate            | 0.50±0.02c | 0.51±0.03c  | 0.52±0.02bc | 0.55±0.02b | 0.64±0.02a |
| 29.98 | 1476 | Jasminelactone               | 1.41±0.13  | 1.40±0.07   | 1.37±0.11   | 1.39±0.16  | 1.43±0.09  |
| 30.16 | 1480 | δ-Amylvalerolactone          | 0.39±0.01c | 0.45±0.03ab | 0.42±0.04bc | 0.38±0.02c | 0.48±0.00a |
| 31.71 | 1509 | Dihydroactinidiolide         | 1.37±0.06  | 1.38±0.07   | 1.42±0.14   | 1.45±0.12  | 1.57±0.06  |
| 32.98 | 1537 | BenzylHexanoate              | 0.32±0.01a | 0.23±0.01b  | 0.25±0.04b  | 0.24±0.02b | 0.24±0.01b |
| 34.16 | 1562 | cis-3-Hexenylbenzoate        | 1.96±0.16  | 1.94±0.15   | 2.02±0.22   | 1.93±0.24  | 1.98±0.05  |
| 34.57 | 1570 | Hexylbenzoate                | 0.32±0.02  | 0.32±0.05   | 0.36±0.03   | 0.33±0.02  | 0.35±0.02  |
| 34.95 | 1578 | trans-2-Hexenylbenzoate      | 0.58±0.03  | 0.60±0.05   | 0.66±0.07   | 0.60±0.06  | 0.61±0.03  |
| 35.50 | 1589 | Caryophylleneoxide           | 0.30±0.04  | 0.30±0.01   | 0.31±0.06   | 0.29±0.02  | 0.32±0.02  |
| 39.31 | 1720 | Methylmyristate              | 0.18±0.02  | 0.18±0.01   | 0.18±0.01   | 0.18±0.02  | 0.17±0.02  |
| 41.52 | 1854 | Diisobutylphthalate          | 0.34±0.01  | 0.36±0.02   | 0.40±0.05   | 0.38±0.01  | 0.40±0.03  |
| 42.45 | 1924 | Methylhexadecanoate          | 2.05±0.07  | 2.06±0.17   | 2.01±0.11   | 2.00±0.04  | 2.01±0.12  |

|                                |      |                                              |            |             |             |             |            |
|--------------------------------|------|----------------------------------------------|------------|-------------|-------------|-------------|------------|
| 42.79                          | 1952 | Dibutylphthalate                             | 0.09±0.01  | 0.10±0.02   | 0.10±0.02   | 0.10±0.01   | 0.12±0.02  |
| 44.46                          | 2098 | Methyloleate                                 | 0.19±0.01  | 0.18±0.03   | 0.18±0.01   | 0.18±0.03   | 0.19±0.01  |
| <b>Aldehydes &amp; Ketones</b> |      |                                              |            |             |             |             |            |
| 4.16                           | 854  | (E)-2-Hexenal                                | 11.70±0.11 | 11.93±0.77  | 12.26±0.43  | 12.53±2.17  | 13.17±1.27 |
| 6.04                           | 956  | (E)-2-Heptenal                               | 0.15±0.01  | 0.14±0.02   | 0.17±0.02   | 0.17±0.01   | 0.17±0.01  |
| 6.21                           | 963  | Benzaldehyde                                 | 3.79±0.24  | 3.84±0.16   | 4.08±0.26   | 4.18±0.61   | 4.41±0.31  |
| 7.43                           | 1012 | (E,E)-2,4-Heptadienal                        | 1.05±0.05b | 1.07±0.03b  | 1.30±0.11a  | 1.34±0.19a  | 1.39±0.16a |
| 8.43                           | 1045 | Phenylacetaldehyde                           | 28.51±1.02 | 28.41±1.45  | 28.66±2.67  | 29.21±3.66  | 31.87±1.06 |
| 8.88                           | 1059 | (E)-2-Octenal                                | 1.26±0.11b | 1.29±0.21b  | 1.88±0.14a  | 1.82±0.03a  | 1.67±0.20a |
| 9.22                           | 1069 | Furaneol                                     | 2.95±0.06a | 2.93±0.15a  | 2.86±0.23a  | 2.26±0.33b  | 1.62±0.23c |
| 13.13                          | 1162 | (E)-2-Nonenal                                | 0.78±0.05  | 0.76±0.09   | 0.82±0.09   | 0.82±0.03   | 0.88±0.05  |
| 15.00                          | 1197 | Safranal                                     | 1.83±0.11  | 1.71±0.14   | 1.71±0.23   | 1.63±0.15   | 1.65±0.19  |
| 15.44                          | 1206 | Decanal                                      | 1.06±0.14  | 1.06±0.15   | 1.07±0.14   | 1.09±0.10   | 1.11±0.16  |
| 15.85                          | 1214 | (E,E)-2,4-Nonadienal                         | 0.60±0.02c | 0.83±0.02bc | 1.05±0.17ab | 1.07±0.20ab | 1.09±0.19a |
| 16.05                          | 1218 | β-Cyclocitral                                | 7.92±0.18b | 8.02±0.21b  | 8.54±0.56b  | 8.59±0.58ab | 9.40±0.58a |
| 18.06                          | 1255 | 2,6,6-Trimethyl-1-cyclohexene-1-acetaldehyde | 2.55±0.09  | 2.53±0.22   | 2.54±0.27   | 2.55±0.03   | 2.53±0.20  |
| 18.58                          | 1264 | trans-2-Decenal                              | 0.95±0.10  | 0.96±0.14   | 0.98±0.15   | 0.99±0.13   | 1.13±0.09  |
| 18.77                          | 1267 | α-Ethylidenbenzeneacetaldehyde               | 6.98±0.19a | 5.69±0.21bc | 5.88±0.27bc | 5.91±0.18b  | 5.54±0.14c |
| 18.86                          | 1269 | Citral                                       | 1.37±0.12c | 1.31±0.08c  | 1.35±0.05c  | 1.53±0.04b  | 1.70±0.09a |
| 20.57                          | 1296 | Perillaldehyde                               | 0.23±0.02  | 0.25±0.01   | 0.25±0.02   | 0.24±0.02   | 0.26±0.02  |
| 21.65                          | 1317 | (E,E)-2,4-Decanedienal                       | 1.59±0.18  | 1.53±0.22   | 1.49±0.11   | 1.33±0.08   | 1.33±0.12  |

|                |      |                             |             |            |             |             |             |
|----------------|------|-----------------------------|-------------|------------|-------------|-------------|-------------|
| 24.63          | 1374 | Damascenone                 | 1.68±0.14   | 1.75±0.06  | 1.87±0.09   | 1.76±0.14   | 1.67±0.08   |
| 25.32          | 1387 | Jasmone                     | 1.56±0.08bc | 1.44±0.10c | 1.89±0.23a  | 1.88±0.11a  | 1.81±0.15ab |
| 26.70          | 1413 | Alpha-Ionone                | 1.39±0.09   | 1.42±0.17  | 1.51±0.10   | 1.60±0.19   | 1.69±0.19   |
| 28.07          | 1440 | Nerylacetone                | 1.06±0.08   | 1.05±0.14  | 1.02±0.15   | 0.99±0.14   | 0.98±0.16   |
| 29.53          | 1468 | β-Ionone                    | 9.40±0.09   | 8.51±0.99  | 8.48±1.12   | 8.34±0.81   | 8.44±0.72   |
| 29.69          | 1471 | β-Ionone-5,6-epoxide        | 1.61±0.19b  | 1.67±0.12b | 1.83±0.14ab | 1.85±0.10ab | 1.98±0.07a  |
| 29.84          | 1474 | 5-Methyl-2-phenylhex-2-enal | 1.49±0.06   | 1.51±0.19  | 1.51±0.14   | 1.50±0.13   | 1.52±0.14   |
| <b>Acids</b>   |      |                             |             |            |             |             |             |
| 6.87           | 991  | Hexanoic acid               | 2.47±0.30c  | 2.68±0.45c | 2.79±0.96c  | 3.84±0.28b  | 4.90±0.49a  |
| 7.38           | 1010 | (E)-3-hexenoic acid         | 10.33±1.19  | 10.41±0.35 | 10.52±0.70  | 10.95±0.67  | 11.84±0.86  |
| 9.70           | 1082 | Heptanoic acid              | 0.77±0.12   | 0.79±0.03  | 0.93±0.15   | 0.87±0.05   | 0.84±0.12   |
| 19.04          | 1272 | Nonoic acid                 | 2.49±0.04c  | 2.44±0.12c | 2.31±0.14c  | 2.88±0.30b  | 3.39±0.19a  |
| 23.39          | 1351 | Geranic acid                | 1.48±0.09   | 1.40±0.21  | 1.39±0.13   | 1.37±0.19   | 1.36±0.25   |
| <b>Phenols</b> |      |                             |             |            |             |             |             |
| 20.14          | 1289 | Thymol                      | 1.07±0.05   | 1.06±0.02  | 1.08±0.04   | 1.07±0.02   | 1.08±0.06   |
| 23.26          | 1349 | Eugenol                     | 2.88±0.27ab | 3.11±0.07a | 2.59±0.21bc | 2.42±0.18c  | 2.67±0.11bc |
| 30.88          | 1492 | Butylated Hydroxytoluene    | 0.26±0.02b  | 0.22±0.03b | 0.15±0.02c  | 0.36±0.01a  | 0.37±0.00a  |
| 31.18          | 1498 | 2,4-Di-t-Butylphenol        | 0.97±0.07a  | 0.96±0.05a | 0.69±0.03b  | 0.67±0.05b  | 0.72±0.03b  |
| <b>Others</b>  |      |                             |             |            |             |             |             |
| 9.14           | 1067 | 2-Acetylpyrrole             | nd          | nd         | 1.84±0.17a  | 1.43±0.10b  | 1.45±0.08b  |
| 20.07          | 1288 | Indole                      | 1.25±0.05a  | 1.21±0.02a | 1.10±0.03b  | 1.07±0.02b  | 1.08±0.00b  |

|       |      |                                                |            |            |            |            |            |
|-------|------|------------------------------------------------|------------|------------|------------|------------|------------|
| 21.11 | 1306 | Edulane                                        | nd         | nd         | 0.99±0.07a | 0.82±0.01b | 0.89±0.05b |
| 21.32 | 1310 | 2,6,10,10-Tetramethyl-1-oxaspiro[4.5]dec-6-ene | 0.40±0.02c | 0.66±0.03a | 0.53±0.05b | 0.39±0.04c | 0.40±0.01c |

Note: nd indicates that the substance was not detected in the samples; different small letters in the same row indicate significant difference at  $p < 0.05$ .
